# Supplementary material for: Oxidation modification of Ru-based catalyst for acetylene hydrochlorination
Source: Royal Society of Chemistry journal article supplement (doi:10.1039/c7ra01121k), 2017-01-01
Supplement: c7ra01121k1.pdf [file c7ra01121k1.pdf]

# Oxidation modification of Ru-based catalyst for acetylene hydrochlorination

Baochang Man,<sup>a, b</sup> Haiyang Zhang,<sup>\*a, b</sup> Jinli Zhang,<sup>\*a, c</sup> Xing Li,<sup>a, b</sup> Na Xu,<sup>a,</sup>  
<sup>b</sup> Hui Dai,<sup>c</sup> Mingyuan Zhu<sup>a, b</sup> and Bin Dai<sup>a, b</sup>

## Table of contents:

**Table S1** The catalytic performance of some potential non-mercury catalysts recently reported in the literatures.

**Table S2** The relative content of the elements in the catalysts, determined by XPS spectra.

**Figure S1.** The schematic diagram of four different routes to synthesize Ru-based catalysts.

**Figure S2.** FT-IR spectra of the fresh and used Ru/AC catalysts.

**Figure S3.** Nitrogen adsorption-desorption isotherms of the catalysts.

**Figure S4.** TG curves of the fresh and used catalysts recorded in air atmosphere.

**Figure S5.** High-resolution XPS spectra of Ru 3p for the fresh and used Ru-based catalysts.

**Figure S6.** XPS spectra of C1s for the fresh catalysts.

---

<sup>a</sup> School of Chemistry and Chemical Engineering of Shihezi University, Shihezi, Xinjiang 832000, PR China.

<sup>b</sup> Key Laboratory for Green Processing of Chemical Engineering of Xinjiang Bingtuan, Shihezi, Xinjiang 832000, PR China.

<sup>c</sup> School of Chemical Engineering & Technology, Tianjin University, Tianjin 300072, P.R. China.

\* Corresponding author Tel: 86-993-2057-277; Fax: +86 993 2057210; E-mail address:

[zhy198722@163.com](mailto:zhy198722@163.com) (H.Y. Zhang), [zhangjinli@tju.edu.cn](mailto:zhangjinli@tju.edu.cn) (J.L. Zhang)

19 **Figure S7.** TEM images of the fresh and used catalysts: (a) Fresh Ru/AC, (b) Used  
20 Ru/AC, (c) Fresh Ru/AC-O, (d) Used Ru/AC-O, (e) Fresh (Ru/AC)-O, (f) Used  
21 (Ru/AC)-O, (g) Fresh Ru-O/AC-O, (h) Used Ru-O/AC-O.

22 **Table S1** The catalytic performance of some potential non-mercury catalysts recently reported in the literatures.

| Catalyst                                                   | Composition of catalysts                           | Reaction conditions                                                                                                                              | Initial catalytic activity <sup>a</sup>          | Deactivation rate (% h <sup>-1</sup> ) <sup>b</sup> |
|------------------------------------------------------------|----------------------------------------------------|--------------------------------------------------------------------------------------------------------------------------------------------------|--------------------------------------------------|-----------------------------------------------------|
| Mo <sub>2</sub> N/AC <sup>[1]</sup>                        | 1.5 wt% MoN                                        | T = 180 °C. GHSV(C <sub>2</sub> H <sub>2</sub> ) = 30 h <sup>-1</sup> ,<br>V <sub>HCl</sub> /V <sub>C<sub>2</sub>H<sub>2</sub></sub> = 1.15      | X <sub>A</sub> = 80.0%, S <sub>vcm</sub> > 90.0% | 4.28                                                |
| Au-Bi/C <sup>[2]</sup>                                     | 0.30 wt% Au, n(Bi)/n(Au) = 3                       | T = 180 °C. GHSV(C <sub>2</sub> H <sub>2</sub> ) = 600 h <sup>-1</sup> ,<br>V <sub>HCl</sub> /V <sub>C<sub>2</sub>H<sub>2</sub></sub> = 1.1      | X <sub>A</sub> = 87.0%, S <sub>vcm</sub> > 99.0% | 0.500                                               |
| PdCl <sub>2</sub> -KCl-LaCl <sub>3</sub> /C <sup>[3]</sup> | 0.9 wt% Pd, 0.2 wt% KCl, 0.2 wt% LaCl <sub>3</sub> | T = 120-180 °C. GHSV(C <sub>2</sub> H <sub>2</sub> ) = 120 h <sup>-1</sup> ,<br>V <sub>HCl</sub> /V <sub>C<sub>2</sub>H<sub>2</sub></sub> = 1.15 | X <sub>A</sub> = 98.0%, S <sub>vcm</sub> > 99.5% | 10.500                                              |
| Z4M1 <sup>[4]</sup>                                        | 1.5 at% N                                          | T = 180 °C. GHSV(C <sub>2</sub> H <sub>2</sub> ) = 50 h <sup>-1</sup> ,<br>V <sub>HCl</sub> /V <sub>C<sub>2</sub>H<sub>2</sub></sub> = 1.15      | X <sub>A</sub> = 60.0%, S <sub>vcm</sub> > 90.0% | 0.300                                               |
| Ru-in-CNT <sup>[5]</sup>                                   | 1 wt% Ru                                           | T = 170 °C. GHSV(C <sub>2</sub> H <sub>2</sub> ) = 90 h <sup>-1</sup> ,<br>V <sub>HCl</sub> /V <sub>C<sub>2</sub>H<sub>2</sub></sub> = 1.1       | X <sub>A</sub> = 99.8%, S <sub>vcm</sub> > 99.0% | 0.480                                               |
| Ru-O/AC-O                                                  | 1 wt% Ru                                           | T = 180 °C. GHSV(C <sub>2</sub> H <sub>2</sub> ) = 180 h <sup>-1</sup> ,<br>V <sub>HCl</sub> /V <sub>C<sub>2</sub>H<sub>2</sub></sub> = 1.15     | X <sub>A</sub> = 99.6%, S <sub>vcm</sub> > 99.9% | 0.275                                               |

23 <sup>a</sup> X<sub>A</sub> represents the initial conversion of acetylene and S<sub>vcm</sub> represents the selectivity to VCM of the catalyst.

24 <sup>b</sup> Deactivation rate was defined as (the initial maximum C<sub>2</sub>H<sub>2</sub> conversion – the final C<sub>2</sub>H<sub>2</sub> conversion)/(deactivation period, h)

25 **Table S2** The relative content of the elements in the catalysts, determined by XPS spectra.

| Catalysts       | Ru (wt%) | O (wt%) | C (wt%) | Others (wt%) |
|-----------------|----------|---------|---------|--------------|
| Fresh AC        | ---      | 13.42   | 85.75   | 0.83         |
| Used AC         | ---      | 5.68    | 93.53   | 0.79         |
| Fresh AC-O      | ---      | 22.33   | 77.05   | 0.62         |
| Used AC-O       | ---      | 15.05   | 84.37   | 0.58         |
| Fresh Ru/AC     | 0.98     | 11.57   | 86.98   | 0.47         |
| Used Ru/AC      | 0.92     | 6.46    | 92.23   | 0.39         |
| Fresh Ru/AC-O   | 0.96     | 18.43   | 80.02   | 0.59         |
| Used Ru/AC-O    | 0.91     | 13.51   | 85.06   | 0.52         |
| Fresh (Ru/AC)-O | 0.95     | 19.32   | 79.01   | 0.72         |
| Used (Ru/AC)-O  | 0.93     | 14.85   | 83.56   | 0.66         |
| Fresh Ru-O/AC-O | 0.97     | 20.29   | 78.28   | 0.46         |
| Used Ru-O/AC-O  | 0.95     | 17.58   | 81.09   | 0.38         |

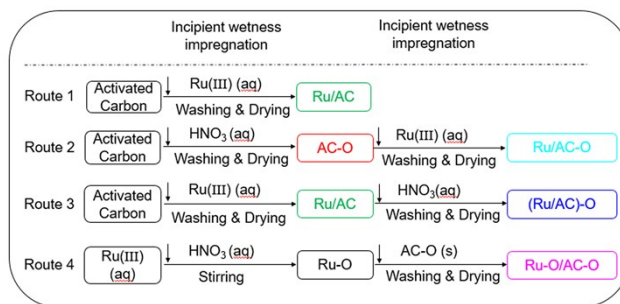

28

29

**Figure S1.** The schematic diagram of four different routes to synthesize Ru-based catalysts.

31

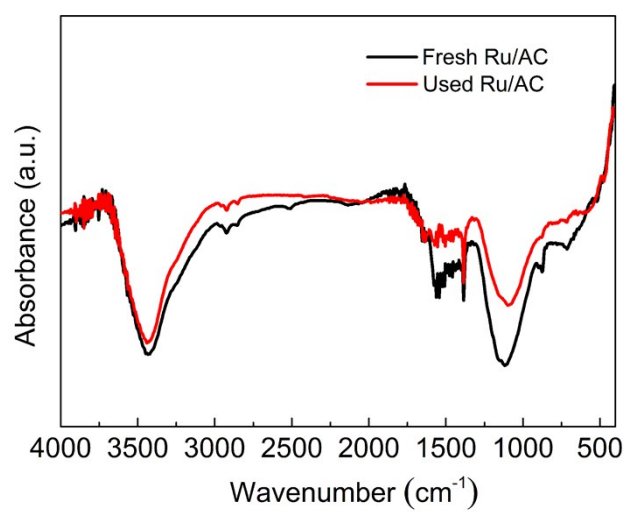

32

33

**Figure S2.** FT-IR spectra of the fresh and used Ru/AC catalysts.

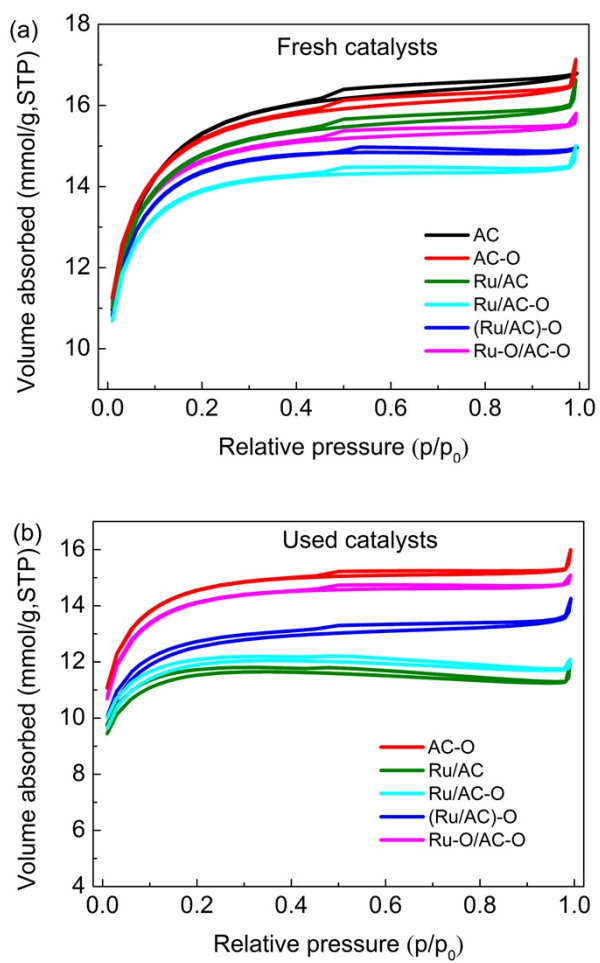

36

37

38

**Figure S3.** Nitrogen adsorption-desorption isotherms of the fresh (a) catalysts and used (b) catalysts.

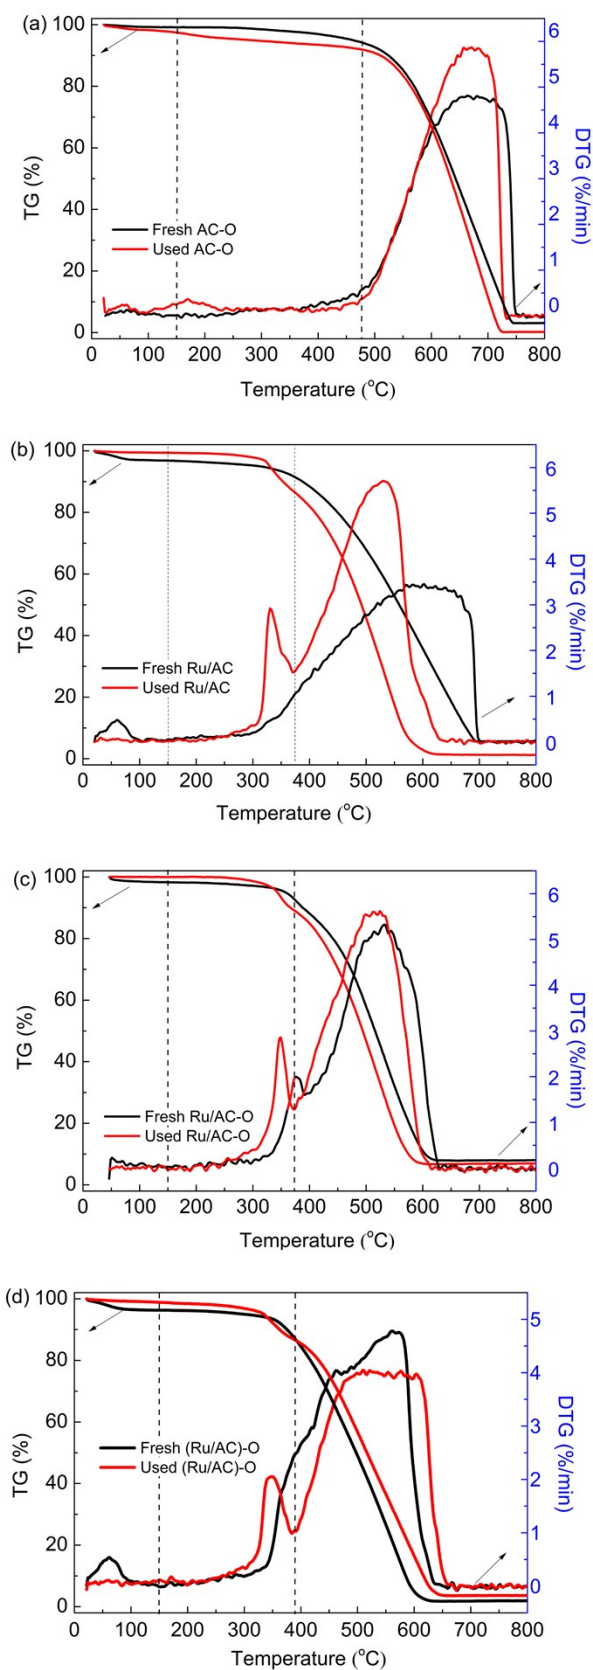

41

42

**Figure S4.** TG curves of fresh and used catalysts recorded in air atmosphere.



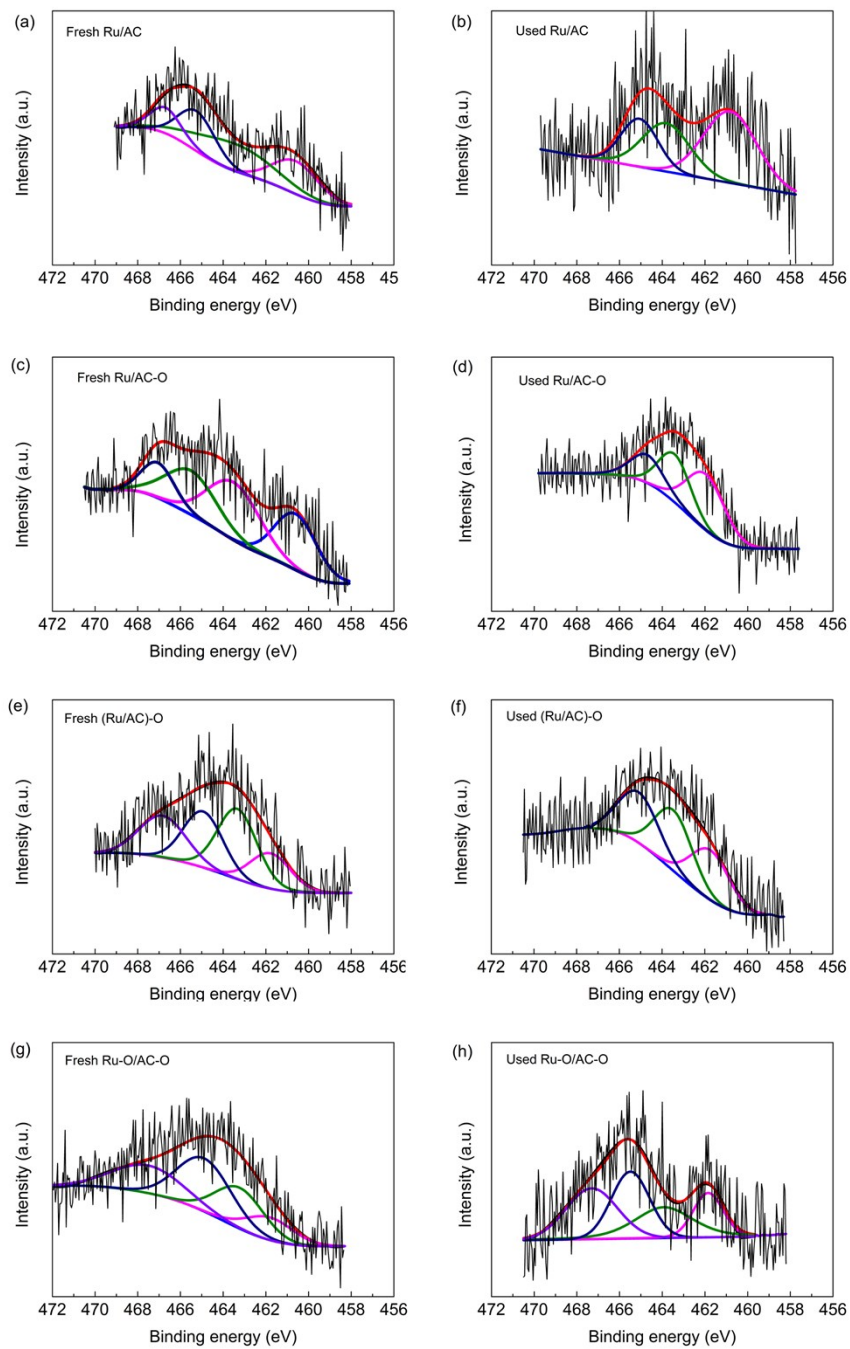

43

44 **Figure S5.** High-resolution XPS spectra of Ru 3p for the fresh and used Ru-based catalysts.

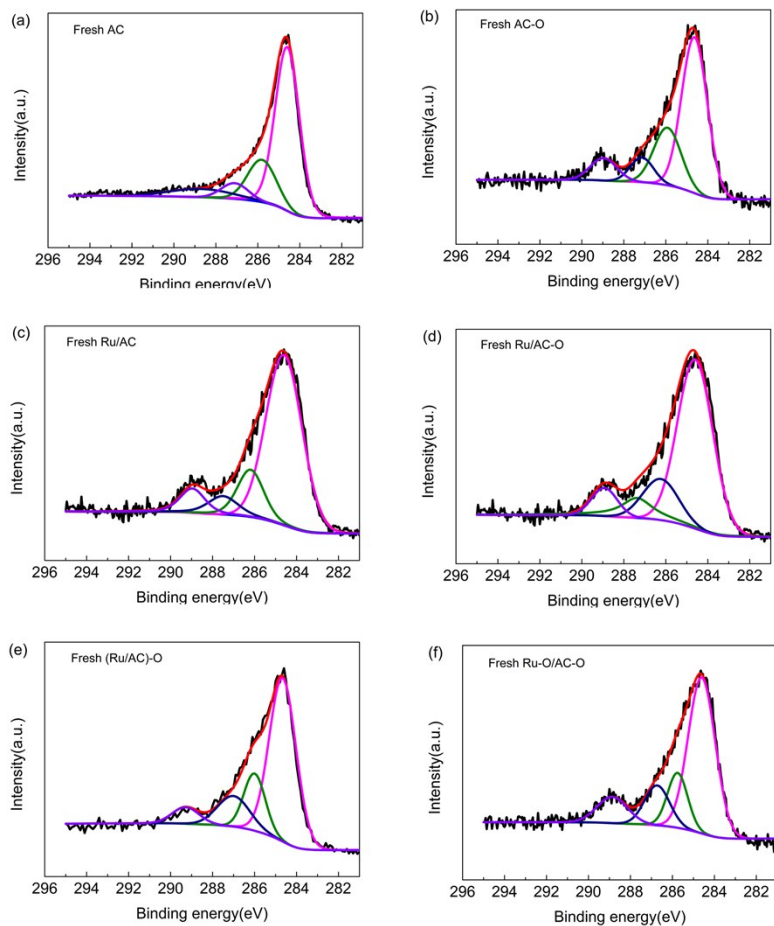

46  
47

**Figure S6.** XPS spectra of C 1s for the fresh catalysts.

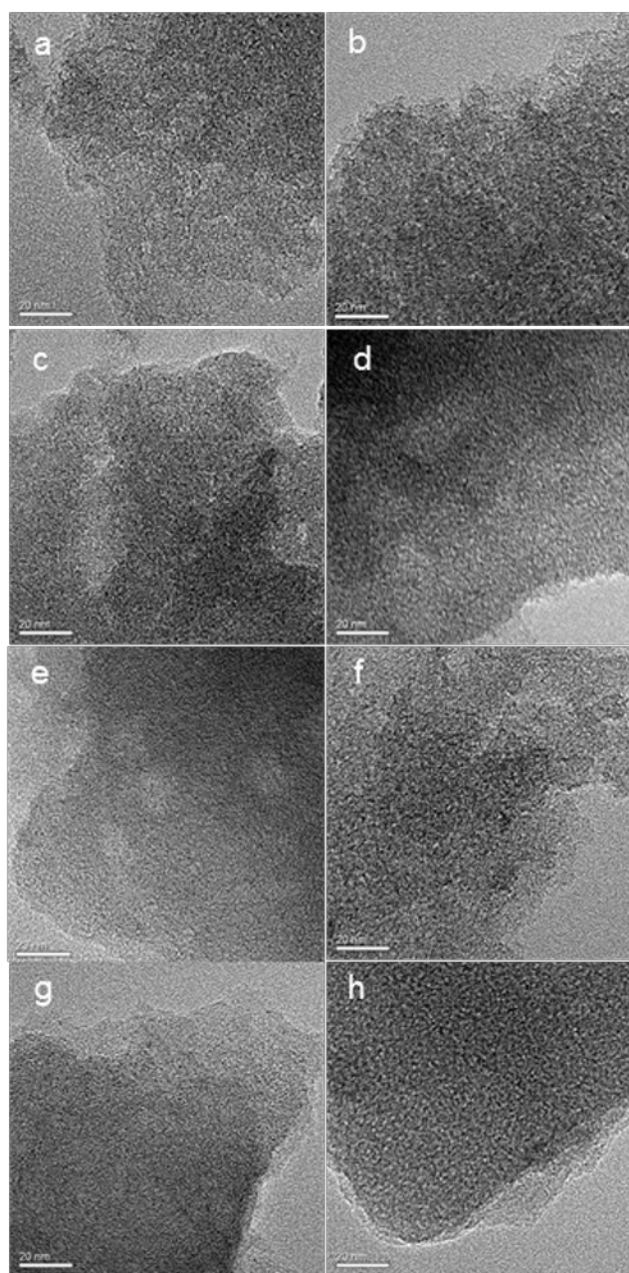

50

51 **Figure S7.** TEM images of the fresh and used catalysts: (a) Fresh Ru/AC, (b) Used Ru/AC, (c)  
52 Fresh Ru/AC-O, (d) Used Ru/AC-O, (e) Fresh (Ru/AC)-O, (f) Used (Ru/AC)-O, (g) Fresh Ru-  
53 O/AC-O, (h) Used Ru-O/AC-O.

55 **References**

- 56 [1] H. Dai, M. Zhu, H. Zhang, F. Yu, C. Wang and B. Dai, *J. Ind. & Eng. Chem.*,  
57 2017.
- 58 [2] K. Zhou, J. Jia, C. Li, H. Xu, J. Zhou, G. Luo, F. Wei, *Green Chem.*, 2015, **17**,  
59 356-364.
- 60 [3] Q. Song, S. Wang, B. Shen, J. Zhao, *Pet. Sci. Technol.*, 2010, **28**, 1825-1833.
- 61 [4] X. Li, J. Zhang and W. Li, *J. Ind. & Eng. Chem.*, 2016, **44**, 146-154.
- 62 [5] G. Li, W. Li, H. Zhang, Y. Pu, M. Sun and J. Zhang, *Rsc Adv.*, 2014, **5**, 9002-9008.
